# Supplementary material for: Automated coronary calcium scoring using deep learning with multicenter external validation
Source: PubMed Central journal article supplement (PMC8169744; doi:10.1038/s41746-021-00460-1), 2021-06-01
Supplement: 41746_2021_460_MOESM1_ESM.pdf [file 41746_2021_460_MOESM1_ESM.pdf]

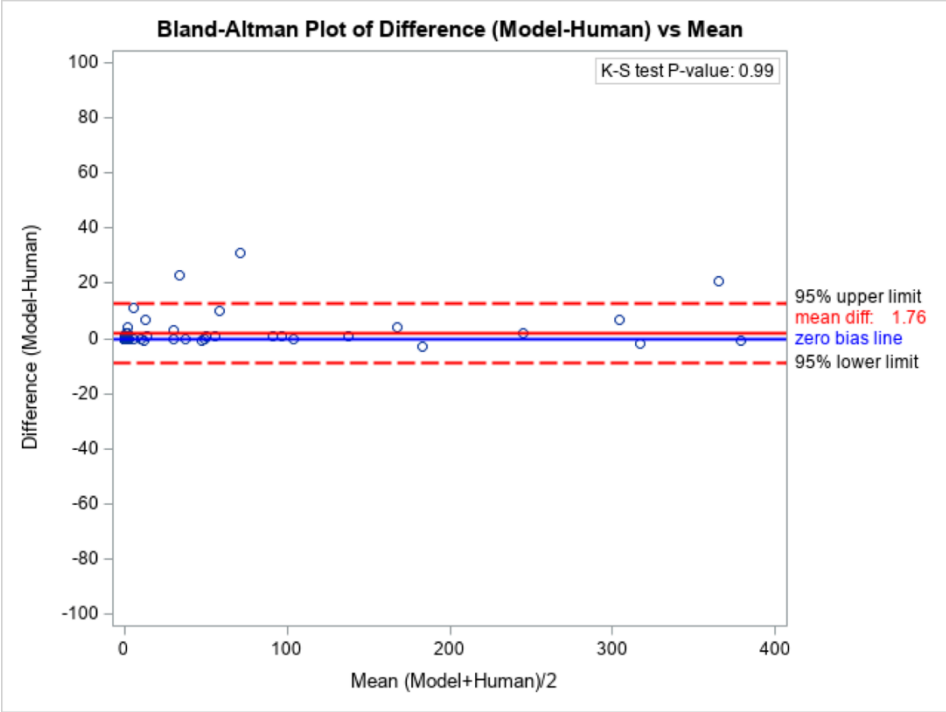

**Supplementary Figure 1.** Bland-Altman plot comparing automated to manual scoring of CAC on gated coronary CT exams of CAC score  $\leq 400$ .

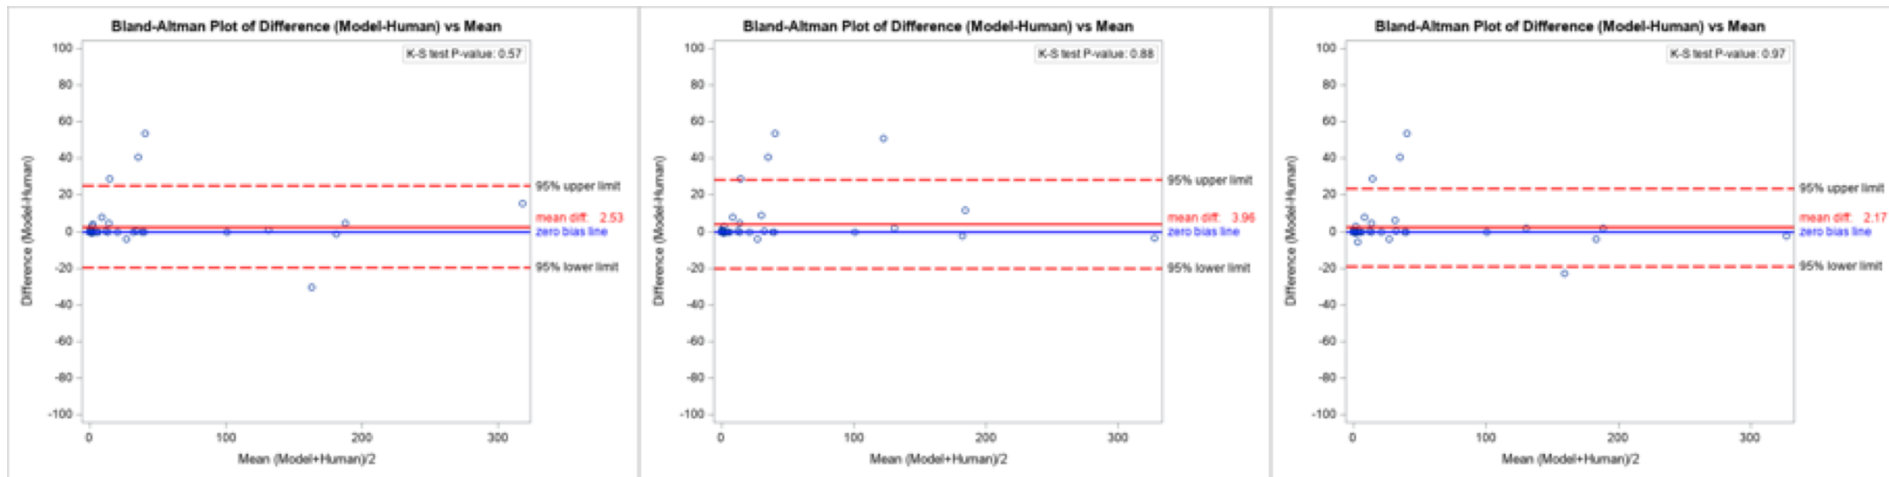

**Supplementary Figure 2.** Bland-Altman plots comparing automated scoring to manual scoring by three different (left, middle, right) technologists on gated coronary CT exams of CAC scores  $\leq 400$ .

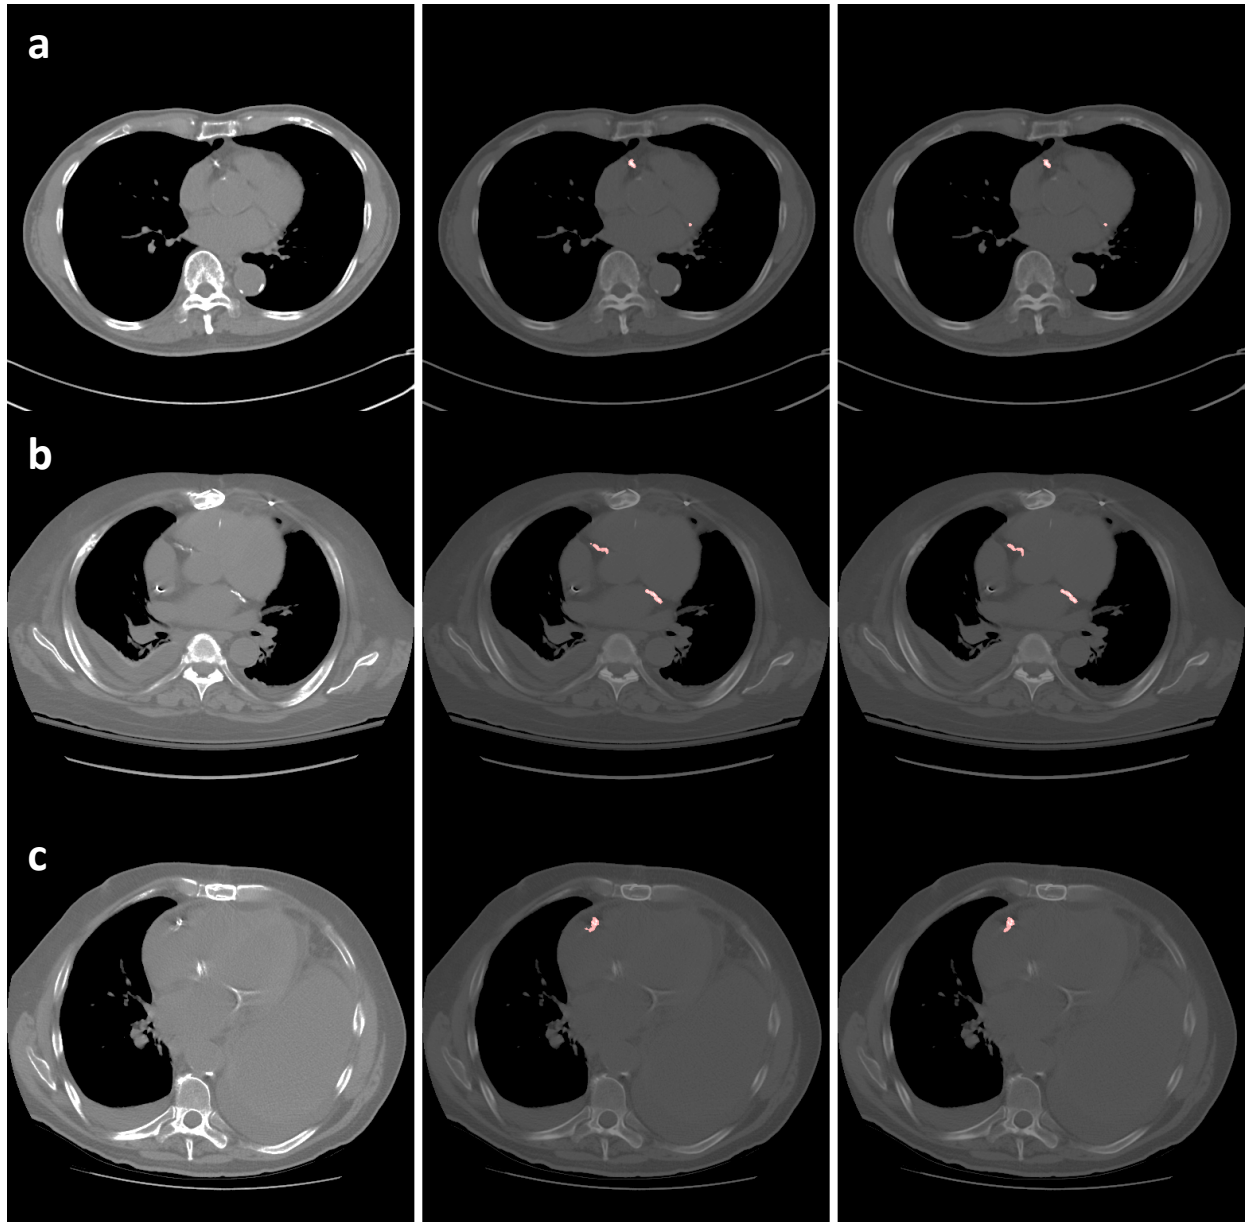

**Supplementary Figure 3.** Coronary artery segmentation (reference image on left, manual in middle; automated on right) in three different patients (rows). Row a shows aortic root calcification (short arrow) and descending aortic calcification (long arrow) that are not inadvertently picked up by the model as coronary calcium. Row b shows the caudal tip of a central venous line (arrow) that is not mistakenly picked up by the model as CAC. Row c is an example of mitral valve calcification (arrow) not inadvertently picked up by the model as CAC.
